# Supplementary material for: Pathogenicity of field strain of fowl aviadenovirus serotype 11 isolated from chickens with inclusion body hepatitis in Morocco
Source: PubMed Central journal article supplement (PMC8675708; doi:10.1371/journal.pone.0261284), 2021-12-16

|    |    |  |  |  |  |  |  |  |  |  |  |  |  |  |  |  |
|----|----|--|--|--|--|--|--|--|--|--|--|--|--|--|--|--|
| 74 | 66 |  |  |  |  |  |  |  |  |  |  |  |  |  |  |  |
| 60 | 62 |  |  |  |  |  |  |  |  |  |  |  |  |  |  |  |
| 66 | 72 |  |  |  |  |  |  |  |  |  |  |  |  |  |  |  |
| 62 | 70 |  |  |  |  |  |  |  |  |  |  |  |  |  |  |  |
| 61 | 70 |  |  |  |  |  |  |  |  |  |  |  |  |  |  |  |

|                               |      |      |       |      |       |      |       |       |       |       |       |       |       |       |       |       |
|-------------------------------|------|------|-------|------|-------|------|-------|-------|-------|-------|-------|-------|-------|-------|-------|-------|
| <b>Mean body weight</b>       | 66,5 | 62,1 | 85,3  | 70,7 | 106,3 | 87,8 | 145,2 | 115,9 | 176,4 | 144,4 | 212,0 | 183,5 | 248,7 | 215,5 | 314,0 | 279,4 |
| <b>Body weight difference</b> | -4,4 |      | -14,5 |      | -18,5 |      | -29,3 |       | -32,0 |       | -28,5 |       | -33,2 |       | -34,6 |       |

|                               |      |       |       |       |       |       |       |       |
|-------------------------------|------|-------|-------|-------|-------|-------|-------|-------|
| <b>Day post infection</b>     | 3    | 6     | 9     | 13    | 16    | 20    | 23    | 28    |
| <b>Body weight difference</b> | -4,4 | -14,5 | -18,5 | -29,3 | -32,0 | -28,5 | -33,2 | -34,6 |

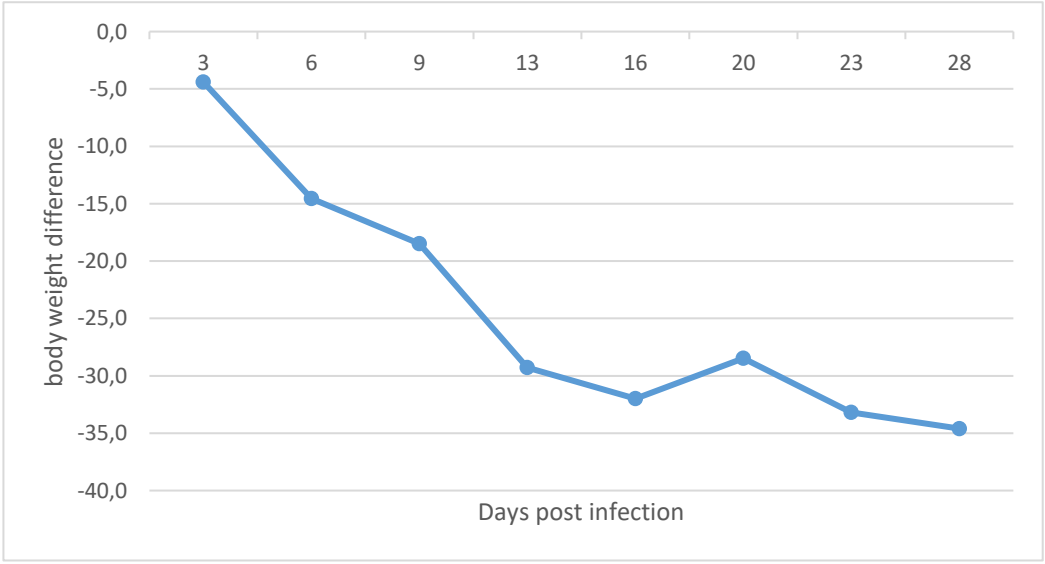

Supplement: pone.0261284.s001.pdf [file pone.0261284.s001.pdf]
